# Supplementary material for: Genetic Potential of Newly Developed Maize Hybrids under Different Water-Availability Conditions in an Arid Environment
Source: MDPI journal article supplement (doi:10.3390/life14040453), 2024-03-29
Supplement: s1 [file s1]

**Table S1.** Mechanical and some chemical properties of the investigated soil sample.

| Soil properly                     | Season 2019 | Season 2020 |
|-----------------------------------|-------------|-------------|
| Mechanical analysis:              |             |             |
| Coarse sand %                     | 5.11        | 5.20        |
| Fine sand %                       | 25.18       | 23.47       |
| Silt %                            | 20.00       | 20.10       |
| Clay %                            | 49.71       | 51.23       |
| Textural class                    | Clay        | Clay        |
| Chemical analysis:                |             |             |
| pH(1:2.5)                         | 7.95        | 7.92        |
| Organic matter g/kg <sup>-1</sup> | 17.1        | 19.3        |
| EC (dSm <sup>-1</sup> )           | 1.89        | 1.83        |
| Total N%                          | 0.15        | 0.18        |
| Total P%                          | 1.32        | 1.41        |
| Total K%                          | 0.50        | 0.53        |

**Table S2.** The applied drought tolerance indices

| Drought tolerance indices         | Equation                                                                                      | Reference                      |
|-----------------------------------|-----------------------------------------------------------------------------------------------|--------------------------------|
| 1- Mean productivity (MP)         | $MP = \frac{(Y_p + Y_s)}{2}$                                                                  | Rosielle and Hambling (1981)   |
| 2- Stress tolerance index (STI)   | $STI = \frac{(Y_s)(Y_p)}{(\bar{Y}_p)^2}$                                                      | Fernandez (1992)               |
| 3- Tolerance index (TOL)          | $TOL = Y_p - Y_s$                                                                             | Rosielle and Hambling (1981)   |
| 4- Stress sensitivity index (SSI) | $SSI = \frac{1 - \left(\frac{Y_s}{Y_p}\right)}{1 - \left(\frac{\bar{Y}_s}{\bar{Y}_p}\right)}$ | Fischer and Maurer (1978)      |
| 5- Yield index (YI)               | $YI = \frac{Y_s}{\bar{Y}_s}$                                                                  | Gavuzzi et al. (1977)          |
| 6- Yield stability index (YSI)    | $YSI = \frac{Y_s}{Y_p}$                                                                       | Bousslama and Schapaugh (1984) |
| 7- Harmonic mean (HM)             | $HM = \frac{2(Y_p \cdot Y_s)}{Y_p + Y_s}$                                                     | Jafari et al. (2009)           |

$Y_p$ ,  $Y_s$ ,  $\bar{Y}_p$ , and  $\bar{Y}_s$  refers to yield under normal conditions, yield under stress, mean yield under normal irrigation, and mean yield under drought conditions, respectively.

**Table S3.** Mean performance of parents, crosses, and check hybrids for grain yield, number of rows per ear, number of grains per row, and 100 kernel weight under well-watered and stressed conditions.

| Hybrid         | Grain yield<br>(t/ha) |           | Number of<br>Rows/ear |           | Number of<br>Grains/row |           | 100 kernel<br>weight (g) |           |
|----------------|-----------------------|-----------|-----------------------|-----------|-------------------------|-----------|--------------------------|-----------|
|                | W--Watered            | D--Stress | W--Watered            | D--Stress | W--Watered              | D--Stress | W--Watered               | D--Stress |
| L-1×T-1        | 9.018                 | 7.564     | 13.87                 | 11.83     | 32.87                   | 22.67     | 29.67                    | 29.33     |
| L-2×T-1        | 10.66                 | 10.41     | 13.73                 | 13.33     | 37.37                   | 36.33     | 29.33                    | 28.67     |
| L-4×T-1        | 8.825                 | 8.763     | 13.07                 | 13.00     | 36.67                   | 31.33     | 27.33                    | 25.00     |
| L-5×T-1        | 11.25                 | 11.20     | 11.00                 | 11.67     | 37.43                   | 33.33     | 31.67                    | 29.00     |
| L-6×T-1        | 12.07                 | 11.23     | 13.33                 | 12.87     | 37.00                   | 35.73     | 26.67                    | 24.00     |
| L-7×T-1        | 13.52                 | 12.49     | 15.00                 | 14.50     | 41.07                   | 34.67     | 37.33                    | 37.33     |
| L-8×T-1        | 10.81                 | 10.72     | 12.07                 | 12.47     | 36.27                   | 34.00     | 34.67                    | 32.00     |
| L-9×T-1        | 11.42                 | 9.711     | 12.67                 | 11.93     | 35.53                   | 35.00     | 31.67                    | 29.00     |
| L-10×T-1       | 9.235                 | 8.190     | 12.67                 | 10.33     | 37.60                   | 34.33     | 33.00                    | 33.67     |
| L-11×T-1       | 12.79                 | 12.49     | 15.33                 | 14.67     | 40.27                   | 38.20     | 36.00                    | 35.33     |
| L-1×T-2        | 13.88                 | 12.76     | 15.47                 | 15.87     | 37.73                   | 37.47     | 40.33                    | 35.00     |
| L-2×T-2        | 10.09                 | 8.852     | 13.67                 | 14.00     | 23.33                   | 22.33     | 35.00                    | 30.33     |
| L-4×T-2        | 7.526                 | 7.433     | 14.33                 | 16.00     | 13.33                   | 12.00     | 35.67                    | 27.33     |
| L-5×T-2        | 9.417                 | 8.634     | 14.73                 | 13.67     | 28.27                   | 27.67     | 35.67                    | 30.33     |
| L-6×T-2        | 10.62                 | 10.59     | 13.47                 | 14.00     | 33.93                   | 33.33     | 36.00                    | 29.00     |
| L-7×T-2        | 10.07                 | 10.00     | 13.67                 | 13.27     | 28.67                   | 27.60     | 33.67                    | 31.00     |
| L-8×T-2        | 10.32                 | 8.511     | 13.80                 | 13.53     | 32.80                   | 32.53     | 33.67                    | 31.67     |
| L-9×T-2        | 10.00                 | 9.060     | 12.77                 | 13.50     | 34.93                   | 34.57     | 30.67                    | 30.00     |
| L-10×T-2       | 9.792                 | 8.574     | 12.53                 | 11.93     | 39.13                   | 37.73     | 32.67                    | 32.67     |
| L-11×T-2       | 12.66                 | 12.62     | 14.33                 | 16.33     | 41.60                   | 41.33     | 39.33                    | 38.20     |
| Parental lines |                       |           |                       |           |                         |           |                          |           |
| L-1            | 4.345                 | 2.864     | 14.00                 | 14.00     | 13.67                   | 12.33     | 28.33                    | 30.33     |
| L-2            | 4.703                 | 3.081     | 11.07                 | 11.67     | 13.00                   | 13.00     | 30.00                    | 29.67     |
| L-4            | 4.574                 | 2.803     | 13.67                 | 12.33     | 13.00                   | 11.67     | 28.67                    | 28.33     |
| L-5            | 2.882                 | 2.782     | 12.33                 | 12.33     | 11.67                   | 10.33     | 28.33                    | 23.33     |
| L-6            | 3.661                 | 2.935     | 13.00                 | 12.00     | 21.33                   | 19.33     | 24.67                    | 24.00     |
| L-7            | 5.148                 | 3.501     | 12.33                 | 13.33     | 21.33                   | 19.67     | 27.00                    | 27.00     |
| L-8            | 3.162                 | 2.636     | 12.00                 | 10.67     | 10.00                   | 9.67      | 30.00                    | 29.33     |
| L-9            | 3.507                 | 3.835     | 10.33                 | 9.00      | 17.80                   | 19.43     | 28.00                    | 26.00     |
| L-10           | 3.850                 | 3.562     | 11.67                 | 11.00     | 22.67                   | 21.17     | 31.33                    | 29.67     |
| L-11           | 3.335                 | 3.206     | 12.00                 | 11.43     | 16.67                   | 17.77     | 30.33                    | 25.00     |
| T-1            | 2.881                 | 2.518     | 9.33                  | 9.00      | 9.33                    | 9.00      | 28.33                    | 28.33     |
| T-2            | 3.628                 | 3.225     | 10.67                 | 11.73     | 11.50                   | 11.00     | 27.33                    | 28.33     |
| Check hybrids  |                       |           |                       |           |                         |           |                          |           |
| SC 10          | 11.23                 | 10.45     | 13.67                 | 13.33     | 34.67                   | 33.00     | 33.33                    | 34.00     |
| SC 30K8        | 11.42                 | 10.70     | 13.50                 | 13.40     | 35.00                   | 33.73     | 35.00                    | 34.67     |
| LSD 0.05       | 0.961                 | 1.052     | 1.69                  | 1.44      | 3.53                    | 4.13      | 4.27                     | 3.60      |
| LSD 0.01       | 1.260                 | 1.380     | 2.21                  | 1.89      | 4.62                    | 5.42      | 5.59                     | 4.73      |

**Table S4.** Mean performance of parents, crosses, and check varieties for plant height, ear height, days to tasseling, days to silking, and chlorophyll content under well-watered and stressed conditions.

| Hybrid         | Plant height<br>(cm) |        | Ear height<br>(cm) |        | Days to<br>tasseling |        | Days to<br>silking |        | Chlorophyll content<br>(SPAD value) |        |
|----------------|----------------------|--------|--------------------|--------|----------------------|--------|--------------------|--------|-------------------------------------|--------|
|                | W--                  | D--    | W--                | D--    | W--                  | D--    | W--                | D--    | W--                                 | D--    |
|                | Watered              | Stress | Watered            | Stress | Watered              | Stress | Watered            | Stress | Watered                             | Stress |
| L-1×T-1        | 206.0                | 204.0  | 88.00              | 86.67  | 61.00                | 61.33  | 62.67              | 63.67  | 49.73                               | 41.33  |
| L-2×T-1        | 237.3                | 219.3  | 105.33             | 104.7  | 56.33                | 60.67  | 60.67              | 63.33  | 44.67                               | 44.13  |
| L-4×T-1        | 253.7                | 251.0  | 128.67             | 126.3  | 56.00                | 56.33  | 60.67              | 62.33  | 48.17                               | 42.17  |
| L-5×T-1        | 256.0                | 253.3  | 122.33             | 121.3  | 57.67                | 59.33  | 62.67              | 63.67  | 47.10                               | 43.33  |
| L-6×T-1        | 250.0                | 246.7  | 135.00             | 132.7  | 54.67                | 56.33  | 59.67              | 62.00  | 48.30                               | 46.47  |
| L-7×T-1        | 252.7                | 248.3  | 128.33             | 121.7  | 56.00                | 56.67  | 59.67              | 61.70  | 57.17                               | 50.67  |
| L-8×T-1        | 256.7                | 251.7  | 130.67             | 113.3  | 55.00                | 62.67  | 60.00              | 63.00  | 47.97                               | 46.97  |
| L-9×T-1        | 252.0                | 246.3  | 128.67             | 126.7  | 55.67                | 59.00  | 61.67              | 64.00  | 42.33                               | 41.67  |
| L-10×T-1       | 231.3                | 228.3  | 112.00             | 108.0  | 50.67                | 51.67  | 58.33              | 60.67  | 42.77                               | 36.67  |
| L-11×T-1       | 248.0                | 241.7  | 127.33             | 122.0  | 56.67                | 57.33  | 60.67              | 61.67  | 51.33                               | 49.60  |
| L-1×T-2        | 262.0                | 250.7  | 142.67             | 123.3  | 57.33                | 60.33  | 62.67              | 63.67  | 61.67                               | 56.77  |
| L-2×T-2        | 248.3                | 241.7  | 105.00             | 96.67  | 60.00                | 66.00  | 67.00              | 71.67  | 50.00                               | 47.77  |
| L-4×T-2        | 195.3                | 193.7  | 103.33             | 95.33  | 57.00                | 58.67  | 64.33              | 67.33  | 44.33                               | 43.67  |
| L-5×T-2        | 231.7                | 226.7  | 108.67             | 106.0  | 57.67                | 58.67  | 61.67              | 65.33  | 46.67                               | 43.33  |
| L-6×T-2        | 284.3                | 280.0  | 144.00             | 142.7  | 54.67                | 55.00  | 59.33              | 62.33  | 55.00                               | 52.53  |
| L-7×T-2        | 256.7                | 253.3  | 138.00             | 136.7  | 57.67                | 59.67  | 63.67              | 66.00  | 45.80                               | 43.33  |
| L-8×T-2        | 254.0                | 248.0  | 142.67             | 142.3  | 56.33                | 60.67  | 65.00              | 64.67  | 46.43                               | 45.03  |
| L-9×T-2        | 282.0                | 276.7  | 139.33             | 129.0  | 60.00                | 63.33  | 66.33              | 71.00  | 47.87                               | 45.30  |
| L-10×T-2       | 251.3                | 246.0  | 139.33             | 128.7  | 55.00                | 56.00  | 59.00              | 62.33  | 47.33                               | 42.00  |
| L-11×T-2       | 263.3                | 260.7  | 133.33             | 132.7  | 57.33                | 59.67  | 61.67              | 65.00  | 50.13                               | 58.67  |
| Parental lines |                      |        |                    |        |                      |        |                    |        |                                     |        |
| L-1            | 141.7                | 141.3  | 84.67              | 83.00  | 61.00                | 62.67  | 65.00              | 67.00  | 43.27                               | 39.40  |
| L-2            | 177.0                | 176.7  | 81.33              | 81.00  | 60.00                | 61.67  | 62.67              | 65.33  | 41.63                               | 41.13  |
| L-4            | 146.7                | 145.0  | 86.67              | 77.67  | 59.33                | 60.67  | 64.33              | 65.33  | 42.33                               | 38.10  |
| L-5            | 161.7                | 161.0  | 96.67              | 90.33  | 61.67                | 63.00  | 65.67              | 67.33  | 42.67                               | 39.00  |
| L-6            | 173.3                | 173.3  | 97.00              | 90.67  | 63.00                | 63.33  | 67.67              | 69.00  | 45.50                               | 44.20  |
| L-7            | 178.7                | 175.0  | 87.00              | 81.00  | 64.67                | 65.67  | 67.33              | 68.33  | 50.10                               | 47.60  |
| L-8            | 150.0                | 148.3  | 85.33              | 84.33  | 63.33                | 66.00  | 70.00              | 70.33  | 41.80                               | 33.07  |
| L-9            | 197.3                | 194.0  | 85.33              | 83.33  | 62.33                | 63.00  | 68.67              | 69.33  | 43.27                               | 42.03  |
| L-10           | 146.3                | 145.7  | 88.33              | 85.33  | 55.33                | 63.00  | 65.33              | 70.33  | 39.87                               | 38.80  |
| L-11           | 179.0                | 176.7  | 86.00              | 75.33  | 56.67                | 64.33  | 65.33              | 67.67  | 45.10                               | 44.50  |
| T-1            | 156.0                | 153.3  | 87.00              | 85.67  | 60.67                | 61.67  | 67.00              | 68.00  | 41.67                               | 40.67  |
| T-2            | 156.0                | 152.7  | 89.33              | 80.33  | 63.00                | 63.67  | 67.67              | 68.33  | 43.33                               | 42.77  |
| Check hybrids  |                      |        |                    |        |                      |        |                    |        |                                     |        |
| SC 10          | 260.7                | 254.0  | 139.33             | 131.0  | 58.67                | 60.00  | 63.67              | 65.00  | 49.27                               | 45.27  |
| SC 30K8        | 225.0                | 224.7  | 115.00             | 113.3  | 56.33                | 59.00  | 61.67              | 64.00  | 50.67                               | 47.50  |
| LSD 0.05       | 15.64                | 12.34  | 9.95               | 10.30  | 3.56                 | 3.10   | 2.80               | 3.03   | 5.67                                | 4.93   |
| LSD 0.01       | 20.51                | 16.18  | 13.04              | 13.50  | 4.67                 | 4.06   | 3.67               | 3.98   | 7.43                                | 6.47   |

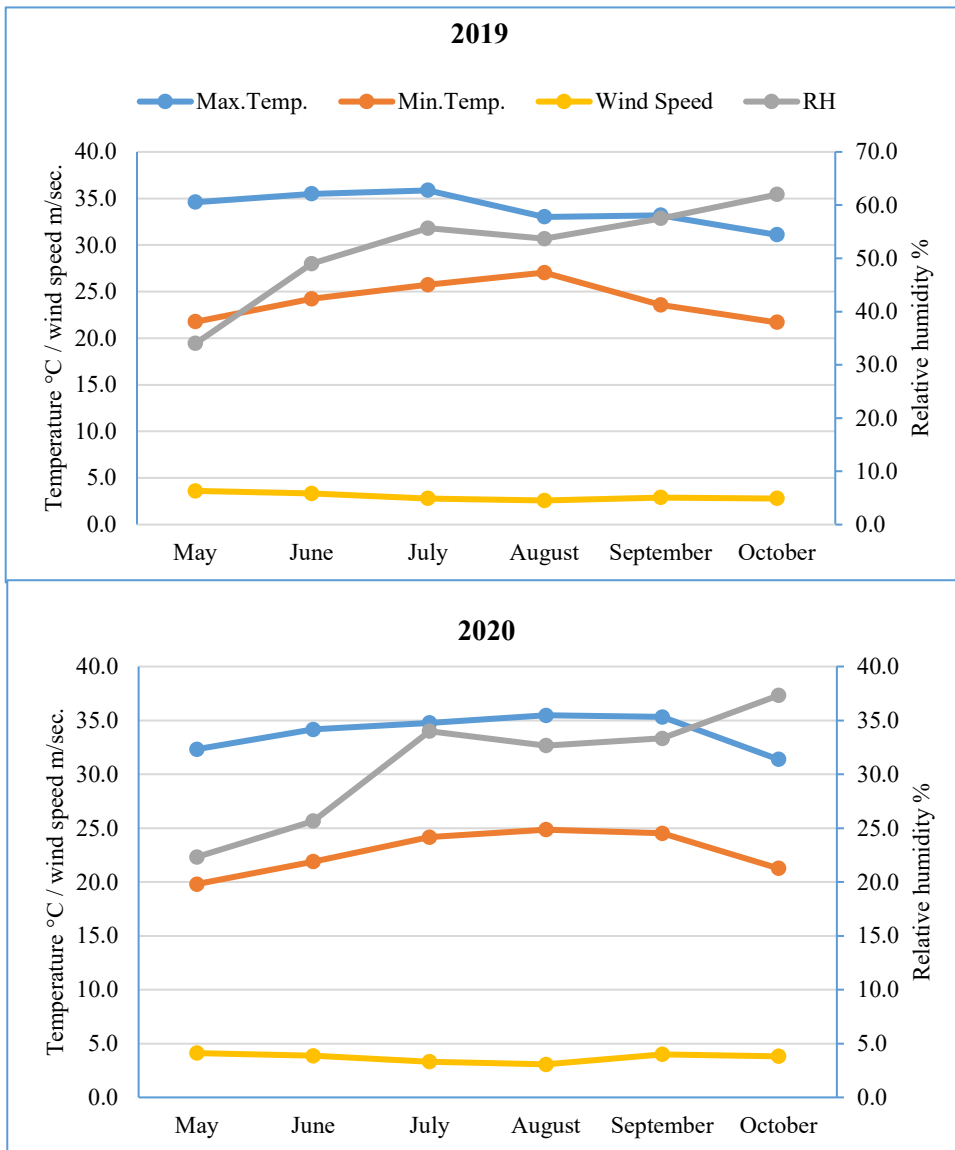

**Figure S1.** Monthly air temperature, relative humidity, and wind speed in two seasons
